# Supplementary material for: Graphene–TiO2 nanocomposite photocatalysts for selective organic synthesis in water under simulated solar light irradiation
Source: Royal Society of Chemistry journal article supplement (doi:10.1039/c4ra01190b), 2014-01-01
Supplement: c4ra01190b1.pdf [file c4ra01190b1.pdf]

*Electronic Supplementary Information for the  
Manuscript*

**Graphene-TiO<sub>2</sub> Nanocomposite Photocatalysts for  
Selective Organic Synthesis in Water under Simulated  
Solar Light Irradiation**

Lan Yuan,<sup>ab</sup> Qianqian Yu,<sup>b</sup> Yanhui Zhang,<sup>ab</sup> and Yi-Jun Xu<sup>\*ab</sup>

<sup>a</sup> *State Key Laboratory of Photocatalysis on Energy and Environment, College of Chemistry and  
Chemical Engineering, Fuzhou University, Fuzhou, 350002, P. R. China*

<sup>b</sup> *College of Chemistry and Chemical Engineering, New Campus, Fuzhou University, Fuzhou,  
350108, P. R. China*

*\*To whom correspondence should be addressed. Tel. /fax: +86 591 83779326*

*E-mail Address: yjxu@fzu.edu.cn*

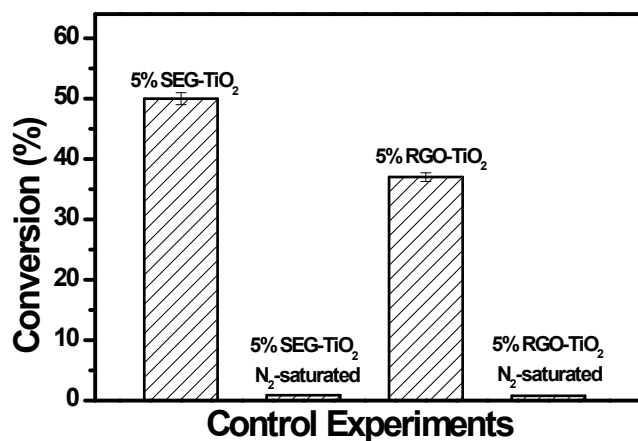

**Fig. S1** The results of photocatalytic selective oxidation of benzyl alcohol over the optimal 5% SEG-TiO<sub>2</sub> and 5% RGO-TiO<sub>2</sub> under O<sub>2</sub> and N<sub>2</sub> atmosphere.

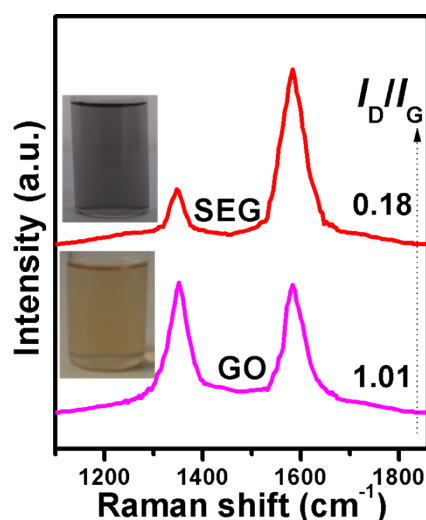

**Fig. S2** Raman spectra of SEG and GO; inset are the corresponding photograph dispersions of SEG and GO in water at 0.3 mg·mL<sup>-1</sup>.

**Note:** Raman spectroscopy has been proven to be a valuable tool to characterize the nanostructures of carbon based nanomaterials. The structure around 1350 cm<sup>-1</sup> is called the “D band” and is related to scattering from local defects or disorders present in the GR sample.<sup>S1-S3</sup> The peak at 1580 cm<sup>-1</sup> is referred to as the “G band” and it originates from the in-plane tangential stretching of the C-C bonds in the graphitic structure.<sup>S1-S3</sup> The intensity ratio of the D and G bands ( $I_D/I_G$ ) is a measure of the relative concentration of local defects or disorders (particularly the sp<sup>3</sup> hybridized defects) compared to the sp<sup>2</sup> hybridized graphene domains.

#### References:

- S1. M.-Q. Yang, B. Weng and Y.-J. Xu, *J. Mate. Chem. A*, 2014, **2**, 1710-1720.  
 S2. V. Datsyuk, M. Kalyva, K. Papagelis, J. Parthenios, D. Tasis, A. Siokou, I. Kallitsis and C. Galiotis, *Carbon*, 2008, **46**, 833-840.  
 S3. I. D. Rosca, F. Watari, M. Uo and T. Akasaka, *Carbon*, 2005, **43**, 3124-3131.
